# Supplementary material for: Advanced titanium dioxide fluidizable nanowire photocatalysts
Source: Royal Society of Chemistry journal article supplement (doi:10.1039/d1ra07681g), 2022-01-01
Supplement: d1ra07681g1.pdf [file d1ra07681g1.pdf]

## Advanced Titanium Dioxide fluidizable nanowire photocatalysts

Kevin Reilly<sup>a</sup>, Babak Adeli<sup>a</sup>, Baizeng Fang<sup>a</sup>, David P. Wilkinson<sup>a,b</sup>, Fariborz Taghipour<sup>a,b\*</sup>,

<sup>a</sup>Department of Chemical and Biological Engineering, University of British Columbia, 2360 East Mall, Vancouver,  
British Columbia V6T 1Z3, Canada

Clean Energy Research Center (CERC), University of British Columbia, 2360 East Mall, Vancouver, British  
Columbia V6T 1Z3, Canada

---

\* [fariborz.taghipour@ubc.ca](mailto:fariborz.taghipour@ubc.ca)

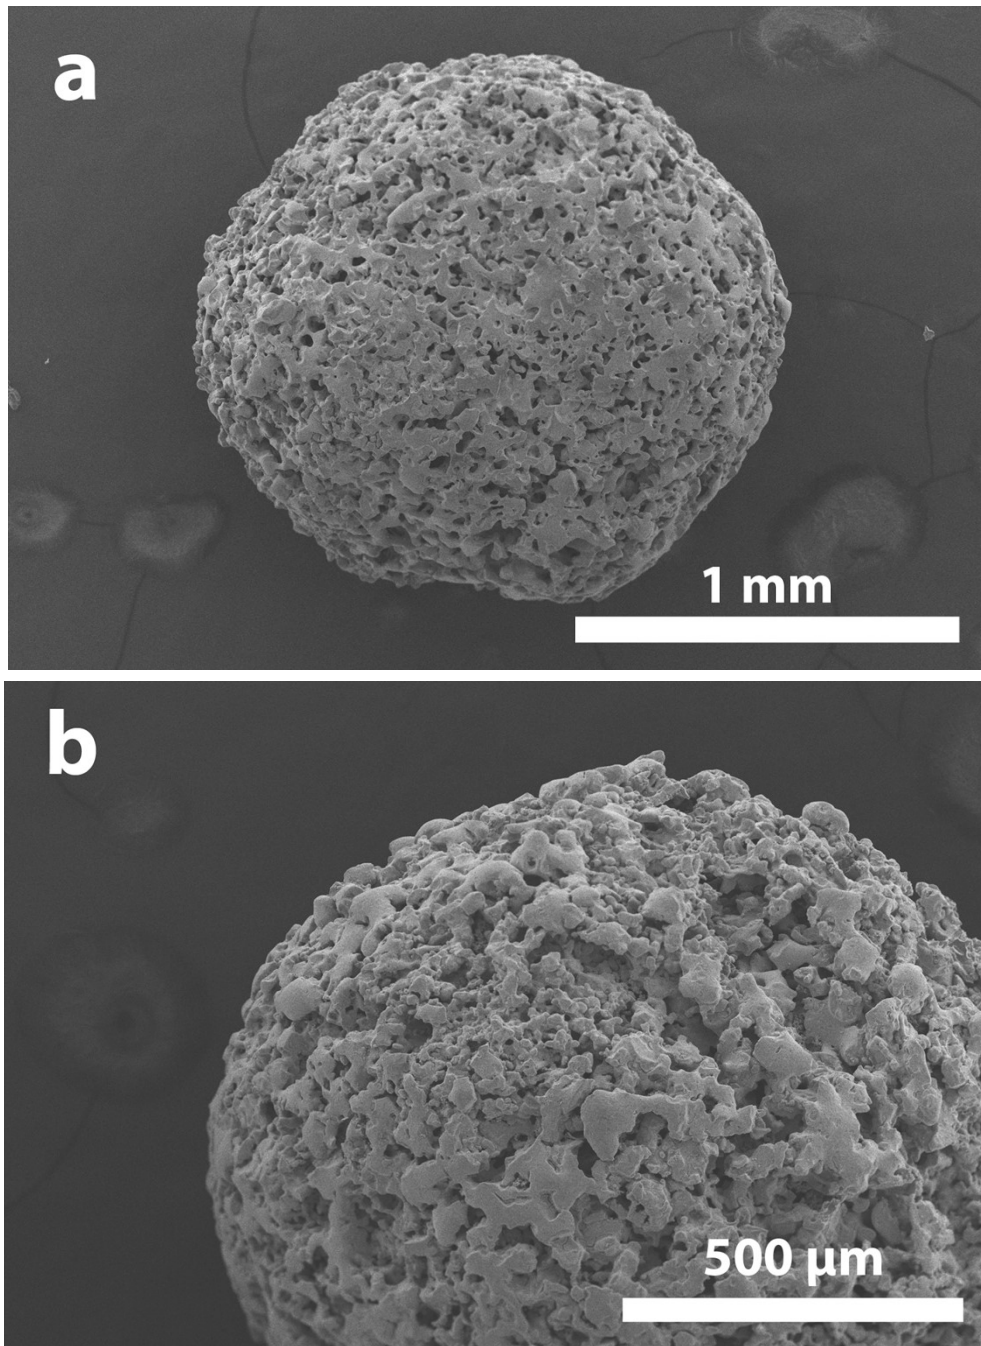

**Figure S1: SEM images of the porous Siran glass particles with various magnifications.**

**Table S1: Summary of hydrothermal growth conditions and resulting nanorod dimensions**

| Sample #            | Initial Hydrothermal Reactor Conditions |                   |                    |                  |                  |                 | $R_q$ | Resulting Nanorod Dimensions |               |                       |
|---------------------|-----------------------------------------|-------------------|--------------------|------------------|------------------|-----------------|-------|------------------------------|---------------|-----------------------|
|                     | $V_{H_2O}$<br>(ml)                      | $V_{HCl}$<br>(ml) | $V_{TTIP}$<br>(ml) | $M_{KCl}$<br>(g) | $M_{cat}$<br>(g) | Time<br>(hours) |       | Growth<br>Quality            | Width<br>(nm) | Length<br>( $\mu m$ ) |
| HTV-1               | 100                                     | 100               | 3.3                | 0                | 0.5              | 7               | 0.3   | Good                         | 257           | 1.72                  |
| HTV-2               | 100                                     | 100               | 3.3                | 0                | 5                | 17              | 2.6   | Moderate                     | 129           | 1.30                  |
| HTV-3               | 100                                     | 100               | 3.3                | 0                | 10               | 17              | 5.3   | Poor                         | 274           | 2.51                  |
| HTV-4               | 100                                     | 100               | 3.3                | 0                | 15               | 17              | 7.9   | Poor                         | 152           | 1.40                  |
| HTV-5               | 100                                     | 100               | 3.3                | 5                | 10               | 17              | 5.3   | Poor                         | 146           | 1.65                  |
| HTV-6               | 100                                     | 100               | 3.3                | 5                | 15               | 17              | 7.9   | Poor                         | 115           | 1.41                  |
| HTV-7               | 100                                     | 100               | 3.3                | 0                | 20               | 7               | 10.5  | Poor                         | 127           | 1.10                  |
| HTV-8               | 100                                     | 100               | 3.3                | 0                | 20               | 17              | 10.5  | Poor                         | 76            | 1.14                  |
| HTV-9               | 100                                     | 100               | 6.6                | 0                | 20               | 7               | 5.2   | Poor                         | 143           | 1.29                  |
| HTV-10              | 100                                     | 100               | 6.6                | 5                | 20               | 8.5             | 5.1   | Poor                         | 85            | 1.15                  |
| HTV-11              | 100                                     | 100               | 6.6                | 5                | 20               | 12              | 5.2   | Poor                         | 166           | 1.62                  |
| HTV-12              | 100                                     | 100               | 10                 | 0                | 20               | 7               | 3.4   | Moderate                     | 322           | 1.18                  |
| HTV-13              | 100                                     | 100               | 10                 | 5                | 20               | 7               | 3.4   | Moderate                     | 223           | 1.10                  |
| HTV-14              | 100                                     | 100               | 12                 | 5                | 20               | 7               | 2.8   | Good                         | 302           | 1.13                  |
| HTV-15              | 100                                     | 100               | 12                 | 8                | 20               | 7               | 2.8   | Good                         | 223           | 1.16                  |
| HTV-16              | 100                                     | 100               | 12                 | 12               | 20               | 7               | 2.8   | Good                         | 228           | 1.15                  |
| HTV-17              | 100                                     | 100               | 12                 | 5                | 25               | 7               | 3.5   | Moderate                     | 226           | 0.97                  |
| HTV-18              | 50                                      | 150               | 20                 | 0                | 20               | 7               | 2.4   | Good                         | 257           | 2.83                  |
| HTV-19              | 50                                      | 150               | 20                 | 3.5              | 20               | 7               | 2.4   | Good                         | 182           | 2.14                  |
| HTV-20 <sup>a</sup> | 45                                      | 45                | 1.5                | 0                | 1                | 7               | 1.2   | Good                         | 240           | 1.65                  |

<sup>a</sup> grown in 180 ml hydrothermal vessel at 150 °C
